# Supplementary material for: Bidirectional Transcriptome Analysis of Rat Bone Marrow-Derived Mesenchymal Stem Cells and Activated Microglia in an In Vitro Coculture System
Source: Hindawi journal article supplement (doi:10.1155/2018/6126413), 2018-07-29
Supplement: f1 [file 6126413.f1.pdf]

**Supporting Information**

**Bidirectional transcriptome analysis of rat bone marrow-derived mesenchymal stem cells and activated microglia in an *in vitro* co-culture system**

Da Yeon Lee<sup>1</sup>, Moon Suk Jin<sup>1</sup>, Balachandran Manavalan<sup>1</sup>, Hak Kyun Kim<sup>2</sup>, Jun Hyeok Song<sup>2</sup>, Tae Hwan Shin<sup>1,3★★</sup>, and Gwang Lee<sup>1,3★</sup>

<sup>1</sup>*Department of Physiology and Department of Biomedical Sciences, Ajou University School of Medicine, Suwon, Republic of Korea*

<sup>2</sup>*Ajou University School of Medicine, Suwon, Republic of Korea*

<sup>3</sup>*Institute of Molecular Science and Technology, Ajou University, Suwon, Republic of Korea*

★★Co-corresponding author: Tae Hwan Shin

Research fellow, Department of Physiology

Ajou University School of Medicine, 164, World cup-ro

Yeongtong-gu, Suwon, 16499, Republic of Korea.

Tel: +82-31-219-4555

Fax: +82-31-219-5049

E-mail: catholicon@ajou.ac.kr

★Corresponding author: Gwang Lee

Professor, Department of Physiology

Ajou University School of Medicine, 164, World cup-ro,

Yeongtong-gu, Suwon, 16499, Republic of Korea.

Tel: +82-31-219-4554

Fax: +82-31-219-5049

E-mail: glee@ajou.ac.kr

**Supplementary Table 1:** Quantitative RT-PCR primer sequences for genes encoding transcriptomic network related to cell migration

| Gene Name                                                 | Symbol | NCBI Ref. seq | Direction | Primer sequence (5'-3')          |
|-----------------------------------------------------------|--------|---------------|-----------|----------------------------------|
| Rattus norvegicus<br>intercellular adhesion<br>molecule 1 | Icam1  | NM_012967.1   | Forward   | ACA GCA TTT ACC CCT<br>CAC C     |
|                                                           |        |               | Reverse   | CAG GTC ACG AGT TCA<br>CAG TC    |
| Rattus norvegicus<br>vascular cell adhesion<br>molecule 1 | Vcam1  | NM_012889.1   | Forward   | TCC AAC TCC CAA AAT<br>CCT GTG   |
|                                                           |        |               | Reverse   | TTC CAG CCT CAT TAA<br>TCC CTT C |
| Rattus norvegicus<br>matrix<br>metallopeptidase 9         | Mmp9   | NM_031055.1   | Forward   | TCA CTT TCC CTT CAC CTT<br>CG    |
|                                                           |        |               | Reverse   | CTC CGT GTA GAG ATT<br>CTC ACT G |
| Rattus norvegicus<br>matrix<br>metallopeptidase 3         | Mmp3   | NM_133523.3   | Forward   | TCT TCC TCT GAA ACT<br>TGG CG    |
|                                                           |        |               | Reverse   | AGT GCT TCT GAA TGT<br>CCT TCG   |

Ref. seq.: Reference sequence

**Supplementary Table 2:** Quantitative RT-PCR primer sequences for genes encoding transcriptomic network related to inflammatory response

| Gene Name                                                  | Symbol | NCBI Ref. seq | Direction | Primer sequence (5'-3')          |
|------------------------------------------------------------|--------|---------------|-----------|----------------------------------|
| Rattus norvegicus toll-like receptor 2                     | Tlr2   | NM_198769.2   | Forward   | GGA TCT TGA TGG CTG<br>TGA TAG G |
|                                                            |        |               | Reverse   | CTT TGT GTT TGC TGT<br>GAG TCC   |
| Rattus norvegicus C-C motif chemokine ligand 2             | Ccl2   | NM_031530.1   | Forward   | GGA CTT CAG CAC CTT<br>TGA ATG   |
|                                                            |        |               | Reverse   | GGA CTT CAG CAC CTT<br>TGA ATG   |
| Rattus norvegicus tumor necrosis factor                    | Tnf    | NM_012675.3   | Forward   | TGG GCT GTA CCT TAT<br>CTA CTC C |
|                                                            |        |               | Reverse   | GGC TGA CTT TCT CCT<br>GGT ATG   |
| Rattus norvegicus glyceraldehyde-3-phosphate dehydrogenase | Gapdh  | NM_017008.4   | Forward   | GAA GAC TGT GGA TGG<br>CCC       |
|                                                            |        |               | Reverse   | CCA TGC CAG TGA GCT<br>TCC       |

Ref. seq.: Reference sequence

**Supplementary Table 3:** Top 20 canonical pathways constructed algorithmically by Ingenuity Pathway Analysis in rBM-MSCs co-cultured with LPS-stimulated microglia compared to rBM-MSCs co-cultured with microglia

| Canonical Pathways                                                             | $-\log(p\text{-value})$ | Number of genes |
|--------------------------------------------------------------------------------|-------------------------|-----------------|
| Interferon Signaling                                                           | 13.7                    | 20              |
| Death Receptor Signaling                                                       | 10.6                    | 28              |
| Hepatic Fibrosis / Hepatic Stellate Cell Activation                            | 9.1                     | 39              |
| Neuroinflammation Signaling Pathway                                            | 8.71                    | 53              |
| iNOS Signaling                                                                 | 8.38                    | 17              |
| Activation of IRF by Cytosolic Pattern Recognition Receptors                   | 8.21                    | 20              |
| TREM1 Signaling                                                                | 7.51                    | 21              |
| Protein Ubiquitination Pathway                                                 | 7.01                    | 44              |
| PPAR Signaling                                                                 | 6.87                    | 23              |
| Apoptosis Signaling                                                            | 6.68                    | 22              |
| Role of JAK1, JAK2 and TYK2 in Interferon Signaling                            | 6.65                    | 11              |
| Osteoarthritis Pathway                                                         | 6.55                    | 37              |
| Granulocyte Adhesion and Diapedesis                                            | 6.47                    | 33              |
| TNFR2 Signaling                                                                | 6.41                    | 12              |
| Role of Macrophages, Fibroblasts and Endothelial Cells in Rheumatoid Arthritis | 6.15                    | 47              |
| Colorectal Cancer Metastasis Signaling                                         | 6.09                    | 49              |
| IL-10 Signaling                                                                | 6.03                    | 18              |
| Role of Pattern Recognition Receptors in Recognition of Bacteria and Viruses   | 6                       | 27              |
| TNFR1 Signaling                                                                | 5.96                    | 15              |
| Hepatic Cholestasis                                                            | 5.61                    | 29              |

**Supplementary Table 4:** Top 20 canonical pathways constructed algorithmically by Ingenuity Pathway Analysis in LPS-stimulated microglia co-cultured with rBM-MSCs compared to LPS-stimulated microglia

| Canonical Pathways                                                             | $-\log(\text{p-value})$ | Number of genes |
|--------------------------------------------------------------------------------|-------------------------|-----------------|
| TREM1 Signaling                                                                | 11.7                    | 31              |
| Neuroinflammation Signaling Pathway                                            | 10.4                    | 73              |
| Role of Macrophages, Fibroblasts and Endothelial Cells in Rheumatoid Arthritis | 9.65                    | 70              |
| Dendritic Cell Maturation                                                      | 8.54                    | 49              |
| iNOS Signaling                                                                 | 7.17                    | 19              |
| IL-10 Signaling                                                                | 7.04                    | 24              |
| Type I Diabetes Mellitus Signaling                                             | 6.93                    | 31              |
| Th1 Pathway                                                                    | 6.87                    | 35              |
| Role of PKR in Interferon Induction and Antiviral Response                     | 6.83                    | 18              |
| Th1 and Th2 Activation Pathway                                                 | 6.82                    | 43              |
| PI3K Signaling in B Lymphocytes                                                | 6.45                    | 34              |
| Altered T Cell and B Cell Signaling in Rheumatoid Arthritis                    | 6.31                    | 26              |
| Colorectal Cancer Metastasis Signaling                                         | 5.97                    | 51              |
| JAK/Stat Signaling                                                             | 5.88                    | 24              |
| Role of Pattern Recognition Receptors in Recognition of Bacteria and Viruses   | 5.81                    | 33              |
| Crosstalk between Dendritic Cells and Natural Killer Cells                     | 5.75                    | 25              |
| HMGB1 Signaling                                                                | 5.64                    | 32              |
| Production of Nitric Oxide and Reactive Oxygen Species in Macrophages          | 5.51                    | 42              |
| Death Receptor Signaling                                                       | 5.46                    | 25              |
| Toll-like Receptor Signaling                                                   | 5.46                    | 22              |

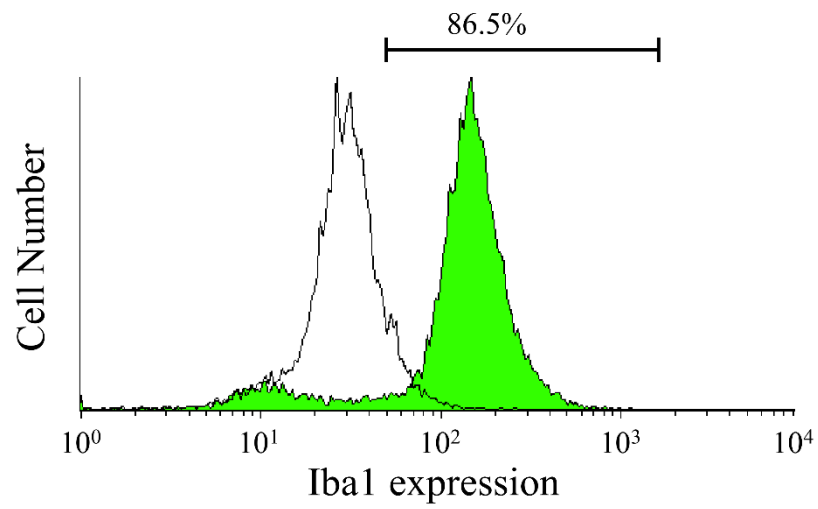

**Supplementary Figure 1:** Flow cytometry analysis of Iba1 positive cells in primary microglia isolated from SD rat pups. Flow cytometry analysis was performed by staining with anti-Iba1. The percentage of Iba1 positive cells were determined as purity of microglia.

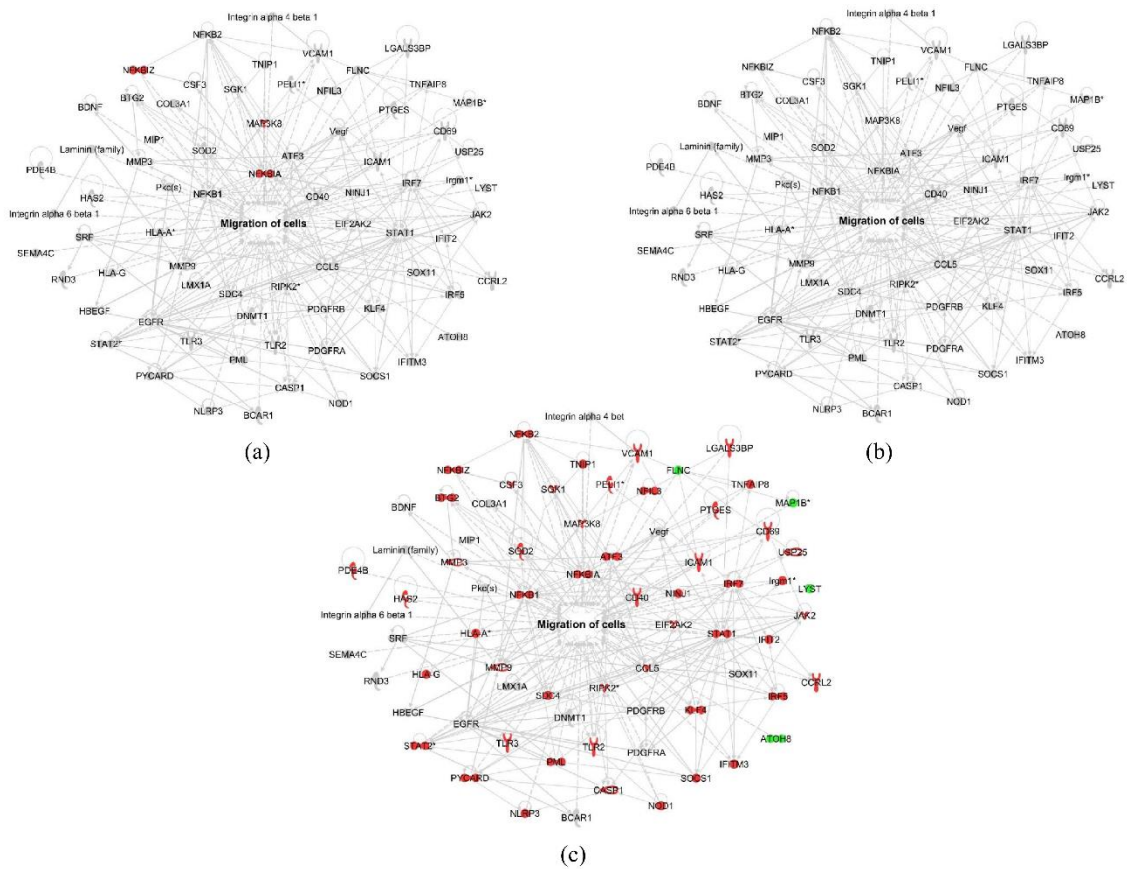

**Supplementary Figure 2:** Transcriptomic network analysis in four different culture conditions of rBM-MSCs. Gene network related to cell migration was constructed algorithmically using Ingenuity Pathway Analysis. Transcriptome network of (a) rBM-MSCs co-cultured with microglia, (b) LPS-treated rBM-MSCs, and (c) rBM-MSCs co-cultured with LPS-stimulated microglia compared to control (rBM-MSCs only), respectively were shown. Red and green areas indicate up- and down-regulated genes, respectively. Differentially expressed genes were obtained from microarray data (>1.5 fold-change).

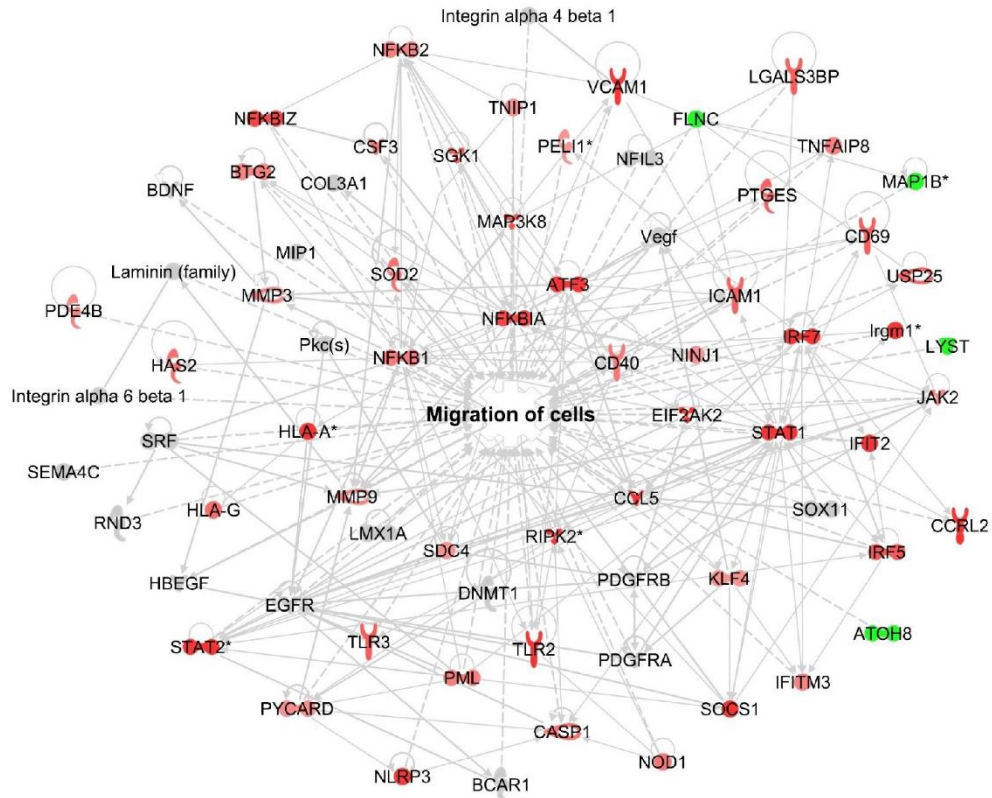

**Supplementary Figure 3:** Gene network related to cell migration in rBM-MSCs co-cultured with LPS-stimulated microglia compared to rBM-MSCs co-cultured with microglia was constructed algorithmically using Ingenuity Pathway Analysis. Red and green areas indicate up- and down-regulated genes, respectively. Differentially expressed genes were obtained from microarray data (>1.5 fold-change).



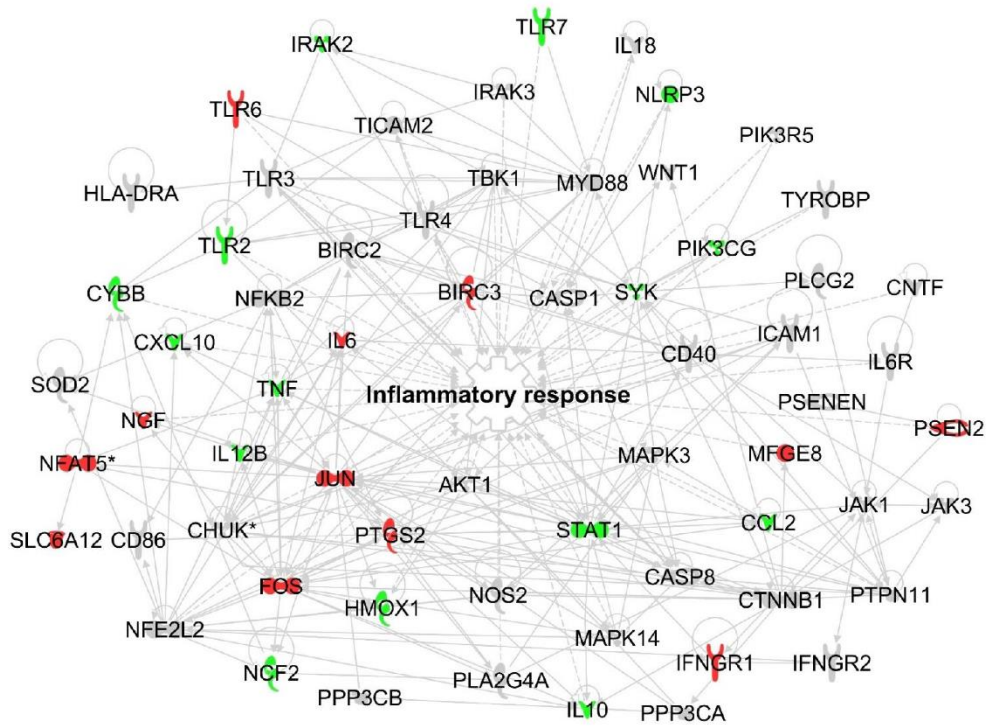

**Supplementary Figure 4:** Gene network related to inflammatory response in LPS-stimulated microglia co-cultured with rBM-MSCs compared to control (microglia only) was constructed algorithmically using Ingenuity Pathway Analysis. Red and green areas indicate up- and down-regulated genes, respectively. Differentially expressed genes were obtained from microarray data (>1.5 fold-change).

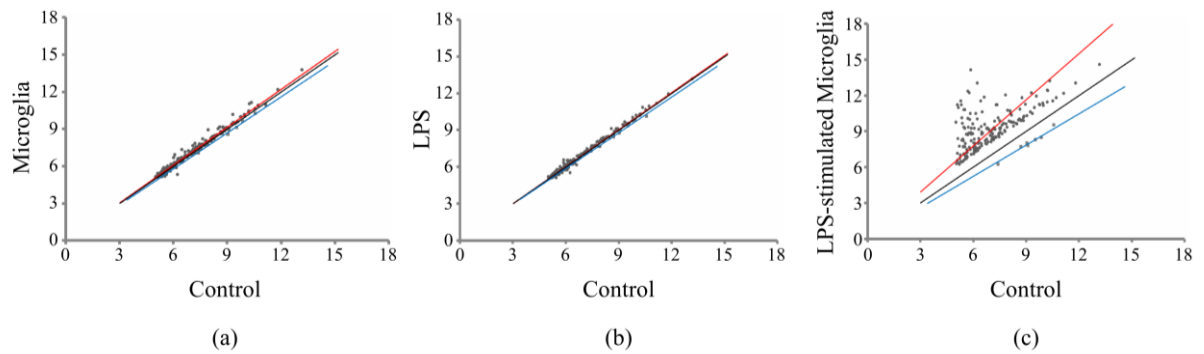

**Supplementary Figure 5:** Plotting of signal intensities in three different culture conditions of rBM-MSCs compared to control (rBM-MSCs only). Correlation of gene expression variation in experimental groups. The X axes indicate the signal intensities of control and Y axes indicate (a) rBM-MSCs co-cultured with microglia, (b) LPS-treated rBM-MSCs, and (c) rBM-MSCs co-cultured with LPS-stimulated microglia, respectively. The black line indicates the criterion line which is standardized with control intensities.

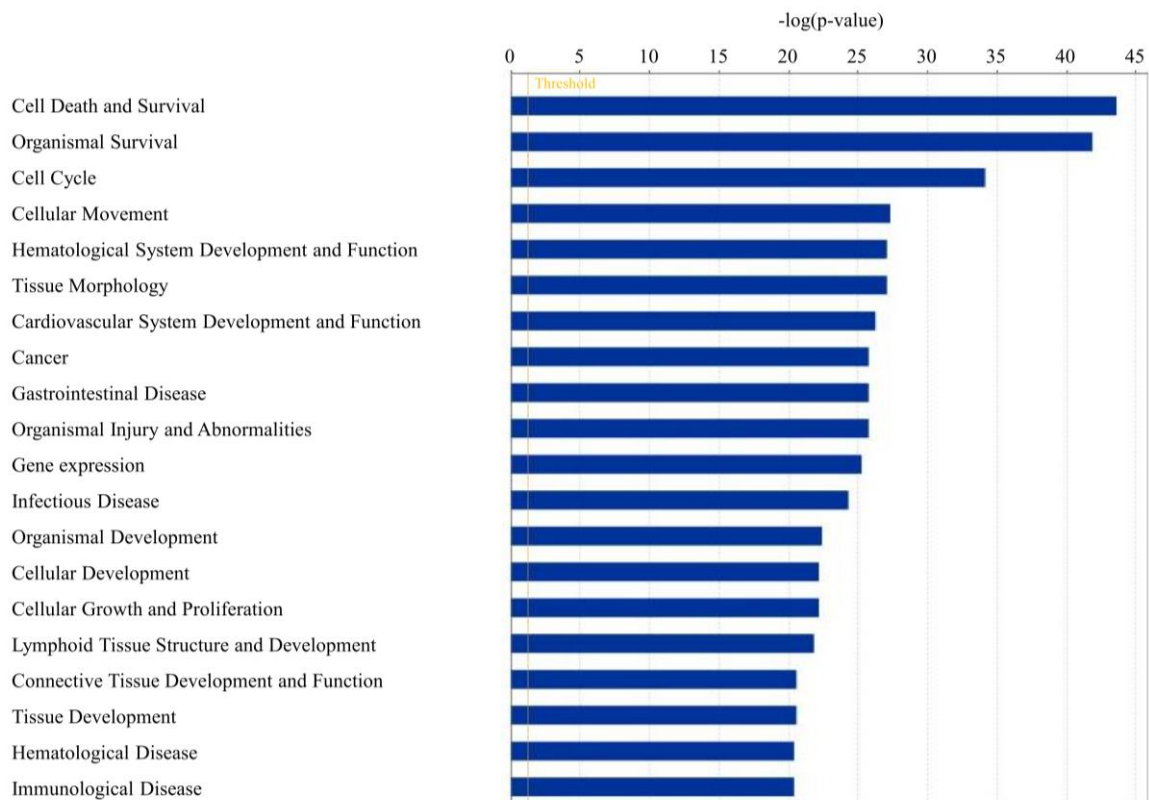

**Supplementary Figure 6:** Top 20 list of function or diseases constructed algorithmically by Ingenuity Pathway Analysis in rBM-MSCs co-cultured with LPS-stimulated microglia compared to rBM-MSCs co-cultured with microglia.

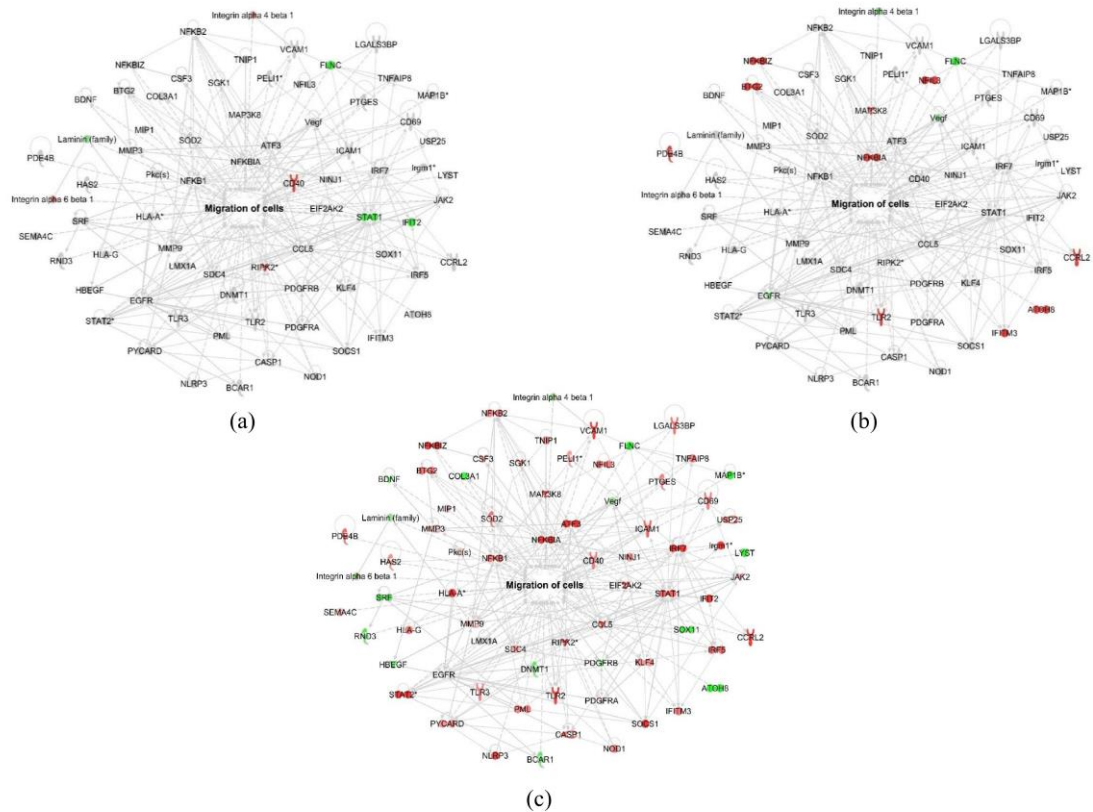

**Supplementary Figure 7:** Transcriptomic network analysis in four different culture conditions of rBM-MSCs. Gene network related to cell migration was constructed algorithmically using Ingenuity Pathway Analysis. Transcriptome network of (a) rBM-MSCs co-cultured with microglia, (b) LPS-treated rBM-MSCs, and (c) rBM-MSCs co-cultured with LPS-stimulated microglia compared to control (rBM-MSCs only), respectively were shown. Red and green areas indicate up- and down-regulated genes, respectively. Differentially expressed genes were obtained from microarray data (>1.2 fold-change).

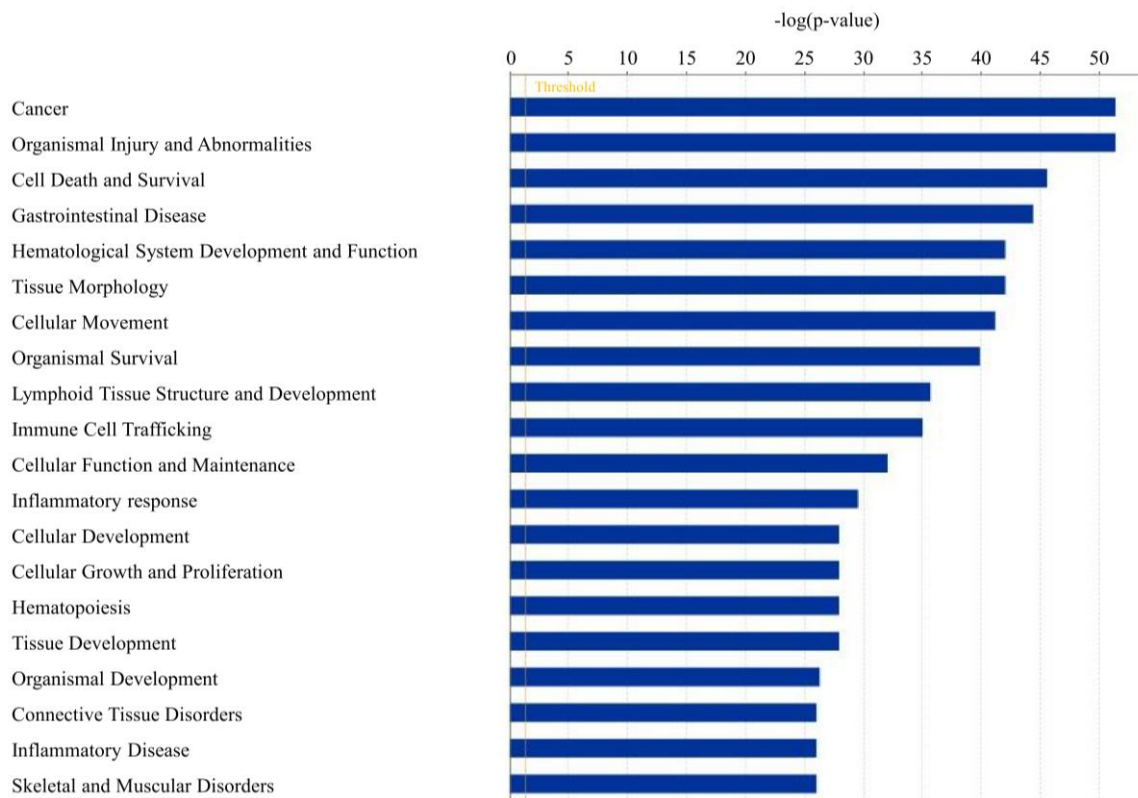

**Supplementary Figure 8:** Top 20 list of function or diseases constructed algorithmically by Ingenuity Pathway Analysis in LPS-stimulated microglia co-cultured with rBM-MSCs compared to LPS-stimulated microglia.

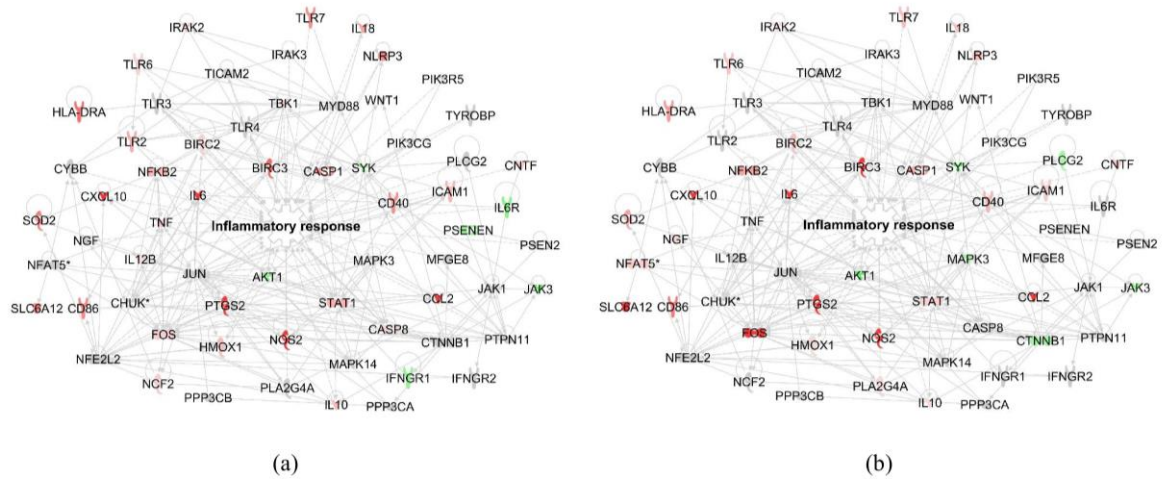

**Supplementary Figure 9:** Transcriptomic network analysis in two different culture conditions of LPS-stimulated microglia. Gene network related to inflammatory response was constructed algorithmically using Ingenuity Pathway Analysis. Transcriptome network of (a) LPS-stimulated microglia and (b) LPS-stimulated microglia co-cultured with rBM-MSCs compared to control (microglia only), respectively were shown. Red and green areas indicate up- and down-regulated genes, respectively. Differentially expressed genes were obtained from microarray data (>1.2 fold-change).

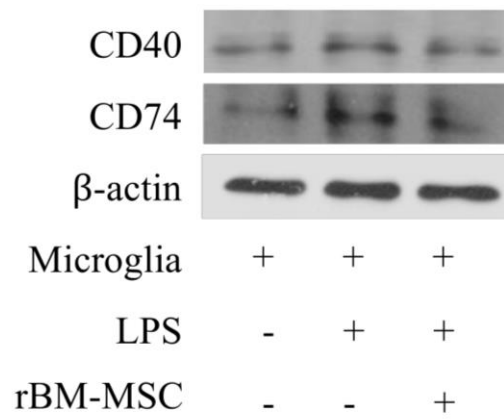

**Supplementary Figure 10:** Western blot analysis in LPS-stimulated microglia co-cultured with rBM-MSCs. Total Protein extracted from microglia in three different conditions. Samples were resolved on a 15% gel and western blotting was performed using anti CD40 and CD74 antibodies.  $\beta$ -actin served as a loading control.
